# Supplementary material
Source: PubMed Central journal article supplement (PMC4456925)
Supplement: supp_tpc.114.134189_tpc134189_SupplementalData.pdf [file supp_tpc.114.134189_tpc134189_SupplementalData.pdf]

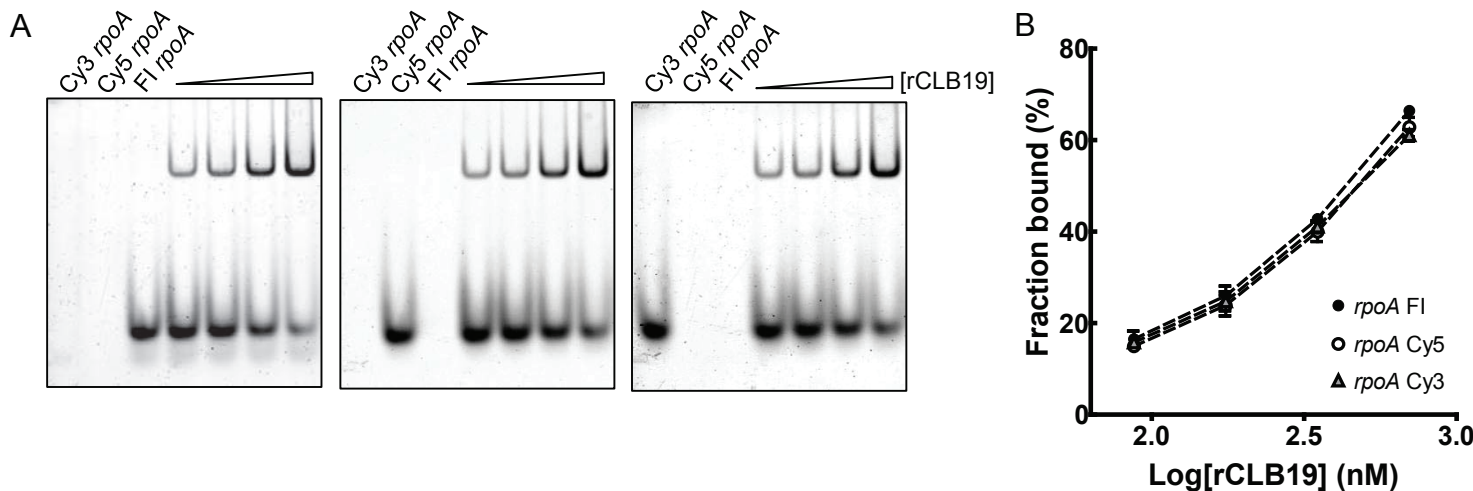

**Supplemental Figure 1. CLB19 shows no label preference.**

(A) RNA electrophoretic mobility shift assay of different concentrations of CLB19-MBP (75, 150, 300 and 600 nM) incubated with 700 pM each of oligonucleotides labelled with fluorescein, Cy3 or Cy5. The three panels show the same gel visualised through filters specific for each of the labels.

(B) Binding curve for the different oligonucleotides indicated in (A). The graphs show mean value  $\pm$ SD (n=3).

## Protein preparation 1

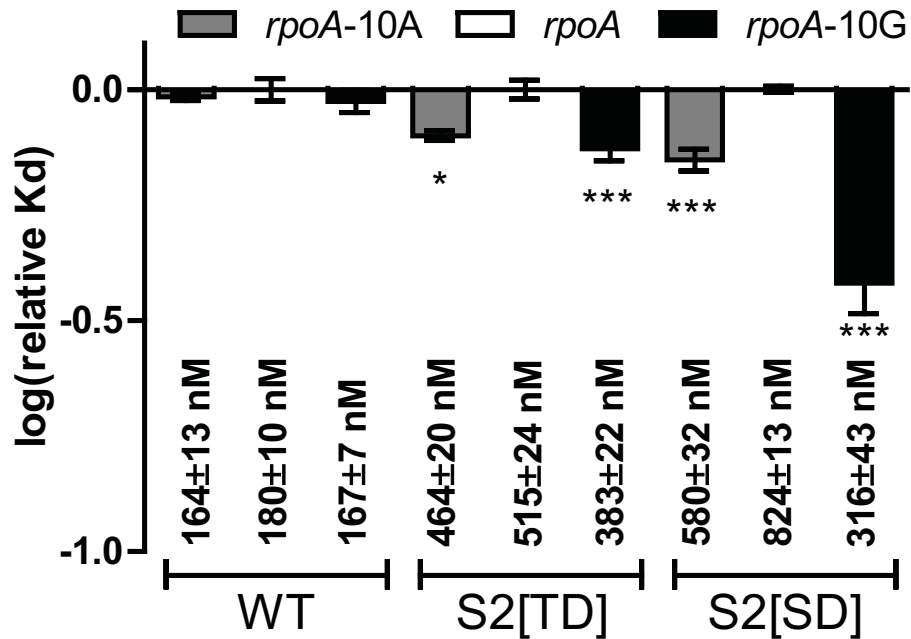

## Protein preparation 2

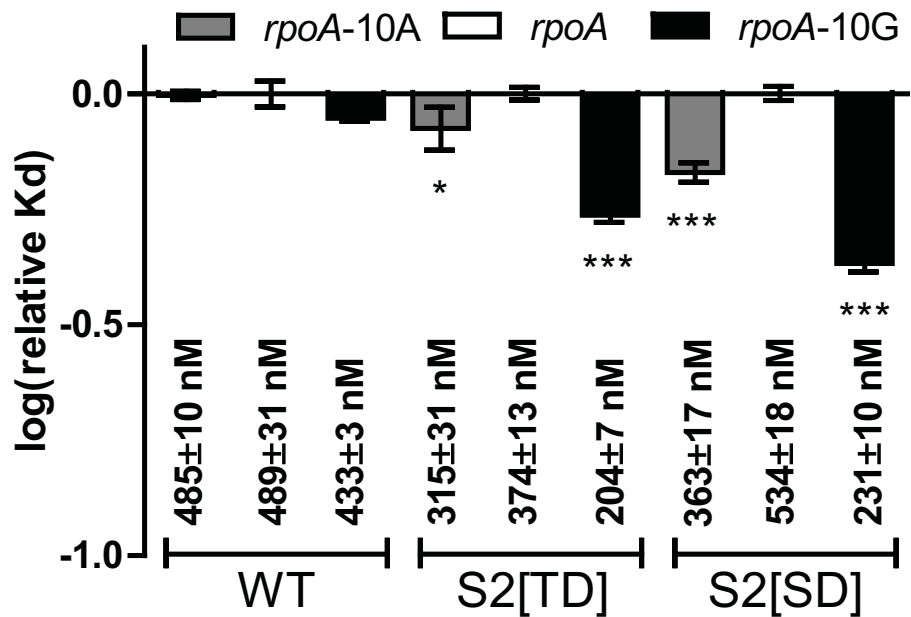

**Supplemental Figure 2. Relative Kd, but not absolute Kd, is reproducible between protein preparations.** Log<sub>2</sub>(relative Kd) normalised to the Kd of *rpoA* for each variant of CLB19 ±SD (n=3). The Kd for each oligo is indicated below the respective bar. Two independent protein preparations of CLB19 and the variants S2[TD] and S2[SD] were prepared and incubated with indicated oligos. Significant preferences within each graph (One-way ANOVA, Tukey's comparison test) are indicated by asterisks: p<0.05 (\*), p<0.001 (\*\*\*).

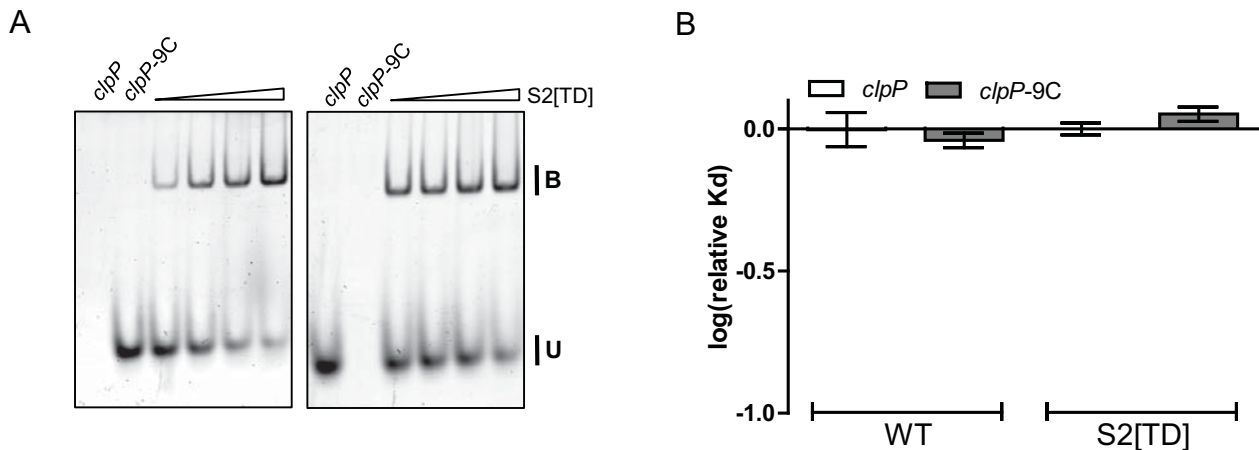

**Supplemental Figure 3. Alignment control for S2[TD].**

(A) RNA electromobility shift assay of different concentrations of CLB19 and S2[TD] (87.5, 175, 350 and 700 nM) that were incubated with 750 pM each of a fluorescein- and a Cy5-labelled oligo. The changes in the oligos are in a position that is not predicted to align with S2. Each reaction was done at least 3 times with the same expressed protein.

(B) Log(relative Kd) normalised to the Kd of *clpP* for CLB19 and the variant S2[TD]  $\pm$ SD (n=3). No significant differences were found.

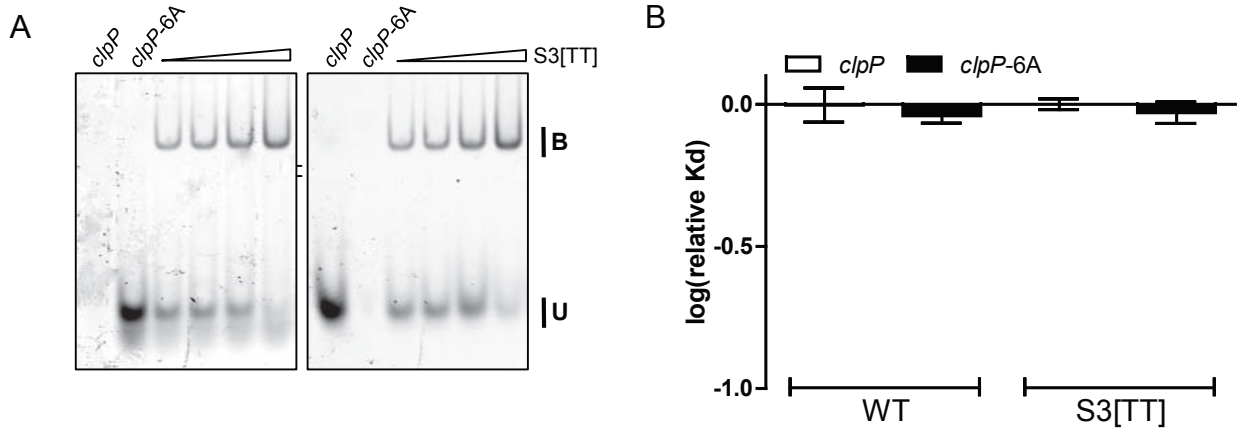

**Supplemental Figure 4. Alignment control for S3[TT].**

(A) RNA electrophoretic mobility shift assay of different concentrations of CLB19 and S3[TT] and (87.5, 175, 350 and 700 nM) that were incubated with 750 pM each of fluorescein-labeled *clpP* and Cy5-labeled *clpP-6A*. The -6A position is not predicted to align with S3. Each reaction was repeated at least 3 times with the same expressed protein.

(B) Log(relative Kd) normalised to the Kd of *clpP* for CLB19 and the variant S3[TT]  $\pm$ SD (n=3). No significant differences were found.

*clpP*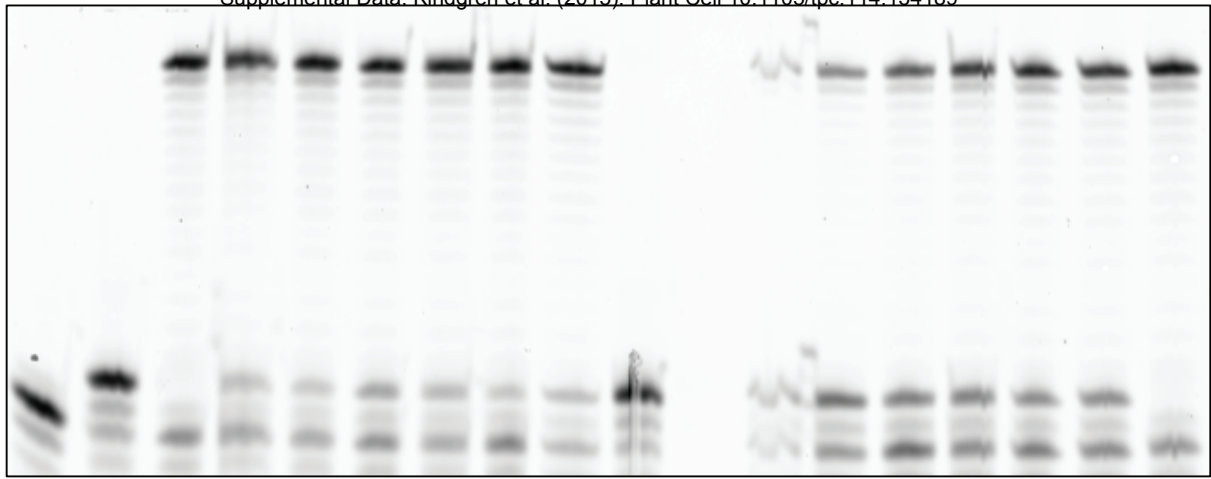

|    |    |     |         |    |    |    |    |    |    |     |  |    |        |    |    |    |     |    |
|----|----|-----|---------|----|----|----|----|----|----|-----|--|----|--------|----|----|----|-----|----|
| %E | 0  | 100 | 88      | 94 | 84 | 89 | 94 | 91 | 0  |     |  | 36 | 59     | 67 | 76 | 72 | 100 |    |
|    | PU | PE  | CLB19wt |    |    |    |    |    | WT | c19 |  |    | S2[SD] |    |    |    |     | PE |

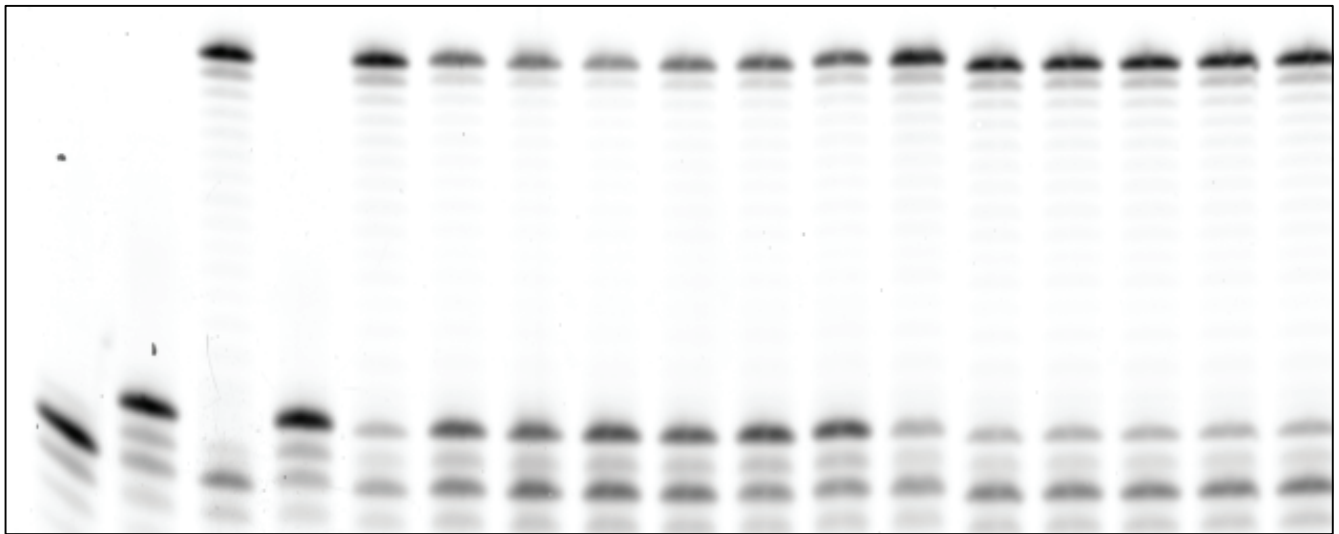

|    |    |     |     |    |        |    |    |    |    |    |        |    |    |    |    |    |
|----|----|-----|-----|----|--------|----|----|----|----|----|--------|----|----|----|----|----|
| %E | 0  | 100 | 0   | 89 | 43     | 42 | 28 | 41 | 42 | 45 | 86     | 90 | 86 | 87 | 87 | 87 |
|    | PU | PE  | c19 | WT | S3[TT] |    |    |    |    |    | S2[TN] |    |    |    |    |    |

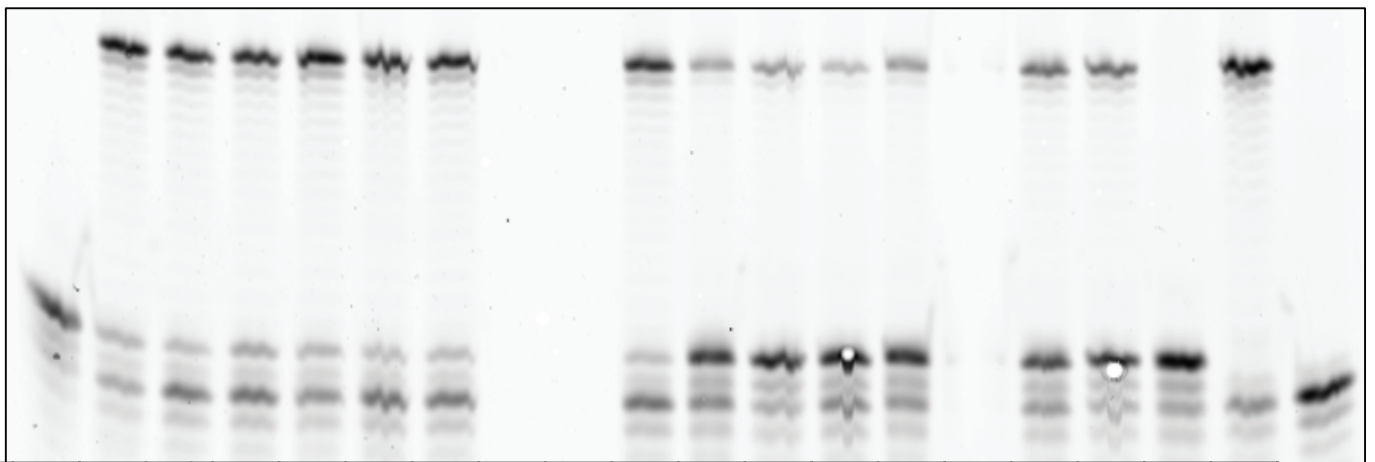

|    |     |    |        |    |    |    |    |  |        |    |    |    |   |    |    |    |    |   |     |
|----|-----|----|--------|----|----|----|----|--|--------|----|----|----|---|----|----|----|----|---|-----|
| %E | 0   | 88 | 90     | 82 | 90 | 91 | 91 |  |        | 90 | 14 | 18 | 7 | 15 |    | 35 | 35 | 0 | 100 |
|    | c19 | WT | S2[TD] |    |    |    |    |  | S3[TD] |    |    |    |   |    | PU | PE |    |   |     |

### Supplemental Figure 5. *clpP* editing induced by variants of CLB19.

Poisoned primer extension analysis of *clpP* in the different CLB19 genotypes. RNA was extracted from 3-week old plants and converted to cDNA. Each reaction comes from a biological replicate. PU and PE indicate an unedited and edited control, respectively. WT indicates Columbia wild-type, c19 indicates *clb19* and CLB19wt indicates plants transformed with wild-type *CLB19* driven by the same promoter as used to drive expression of the variants. % editing was calculated by measuring the intensity of the edited band.

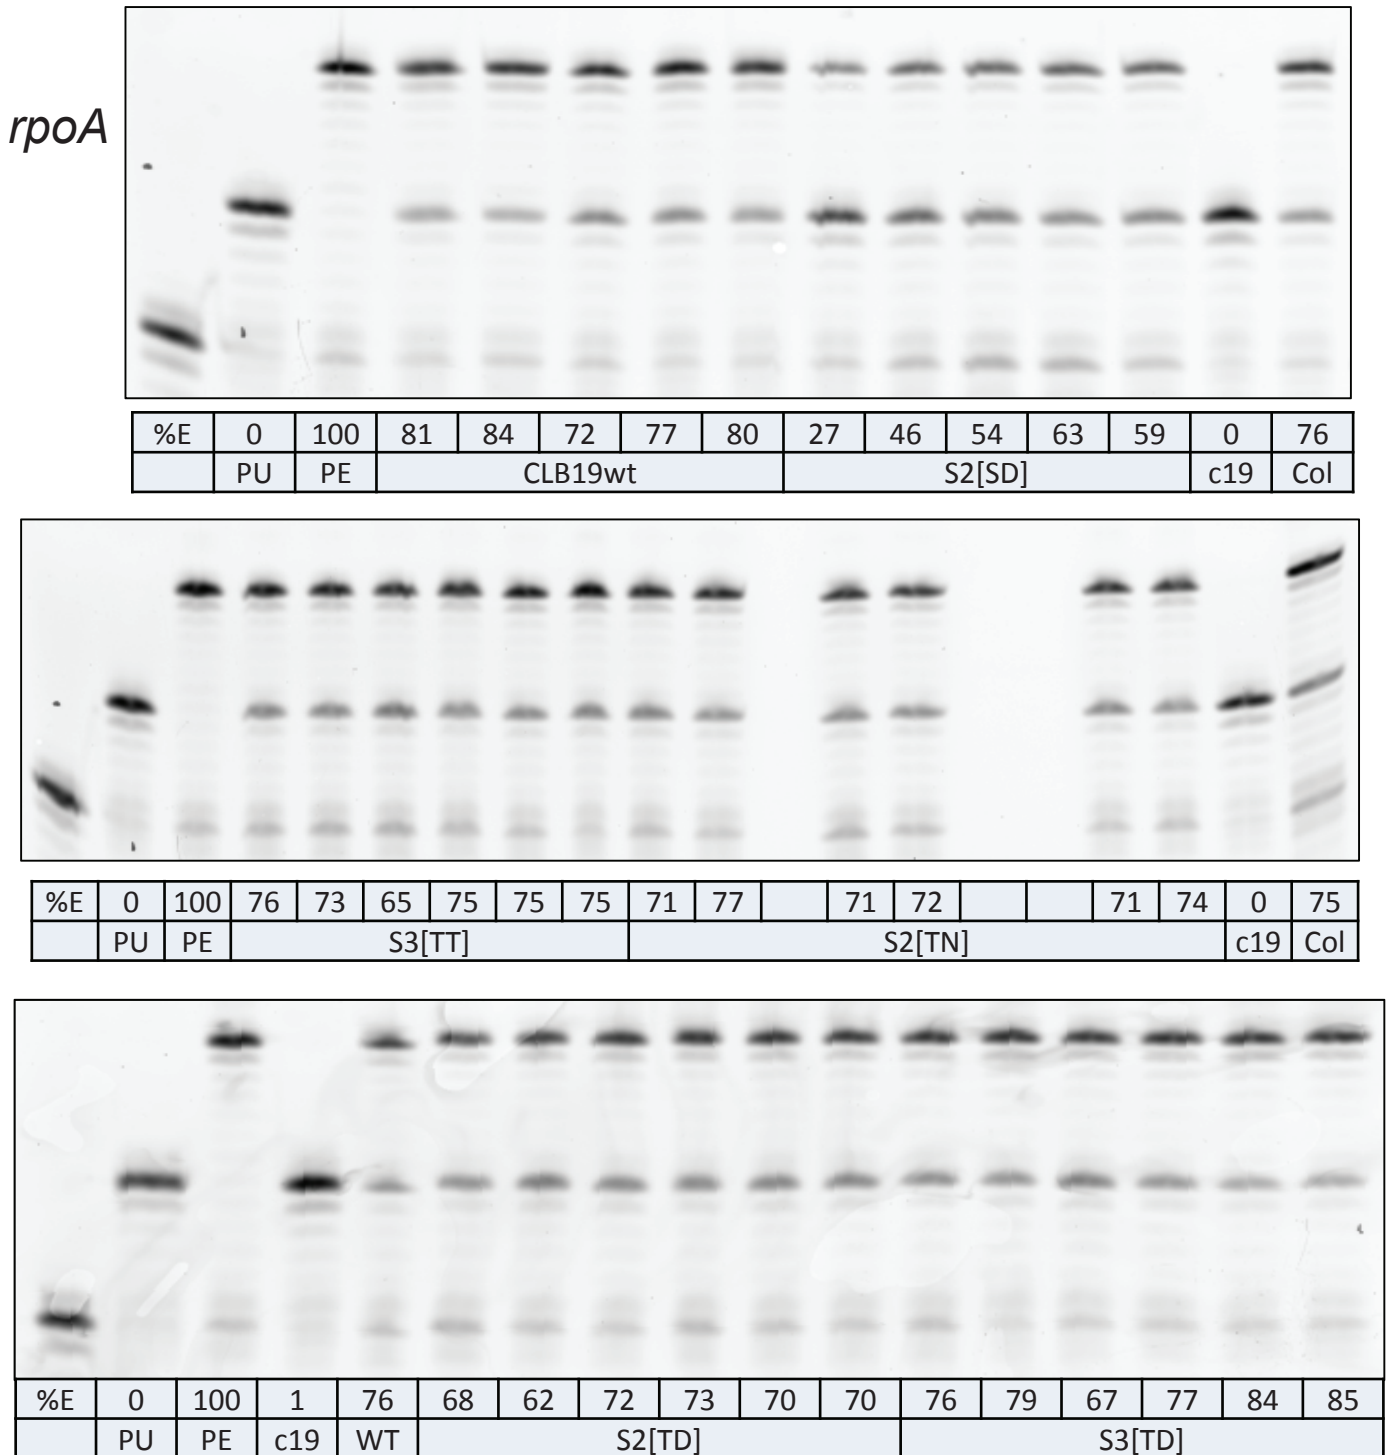

**Supplemental Figure 6. *rpoA* editing induced by variants of CLB19.**

Poisoned primer extension analysis of *rpoA* in the different CLB19 genotypes. RNA was extracted from 3-week old plants and converted to cDNA. Each row comes from a biological replicate. PU and PE indicate an unedited and edited control, respectively. WT indicates Columbia wild-type, c19 indicates *clb19* and CLB19wt indicates plants transformed with wild-type *CLB19* driven by the same promoter as used to drive expression of the variants. % editing was calculated by measuring the intensity of the edited band.

**A** *ndhG*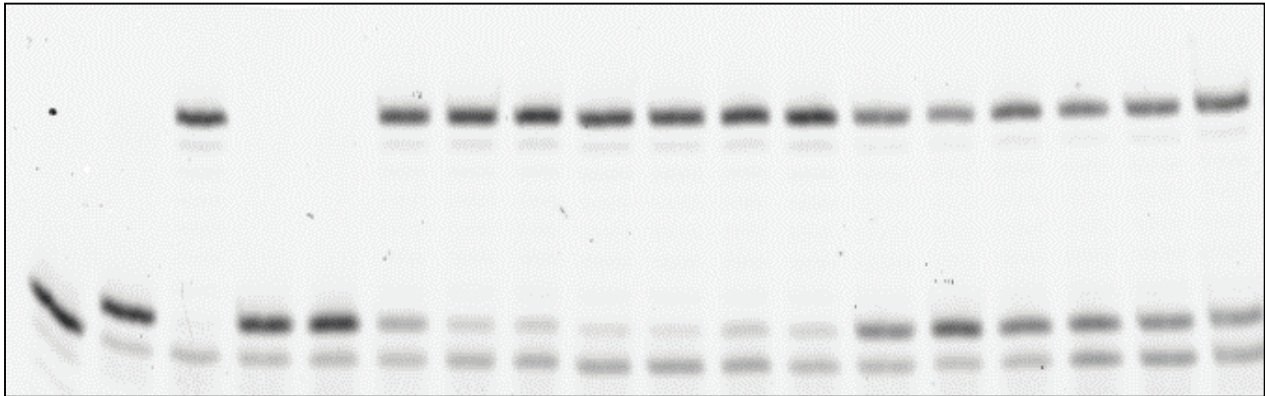

|    |    |     |              |   |     |         |    |    |    |    |    |        |    |    |    |    |    |
|----|----|-----|--------------|---|-----|---------|----|----|----|----|----|--------|----|----|----|----|----|
| %e | 0  | 100 | 1            | 2 | 72  | 87      | 87 | 92 | 94 | 86 | 87 | 51     | 39 | 53 | 47 | 55 | 61 |
|    | PU | PE  | <i>otp82</i> |   | Col | OTP82wt |    |    |    |    |    | S3[TD] |    |    |    |    |    |

**B** *ndhB* 95644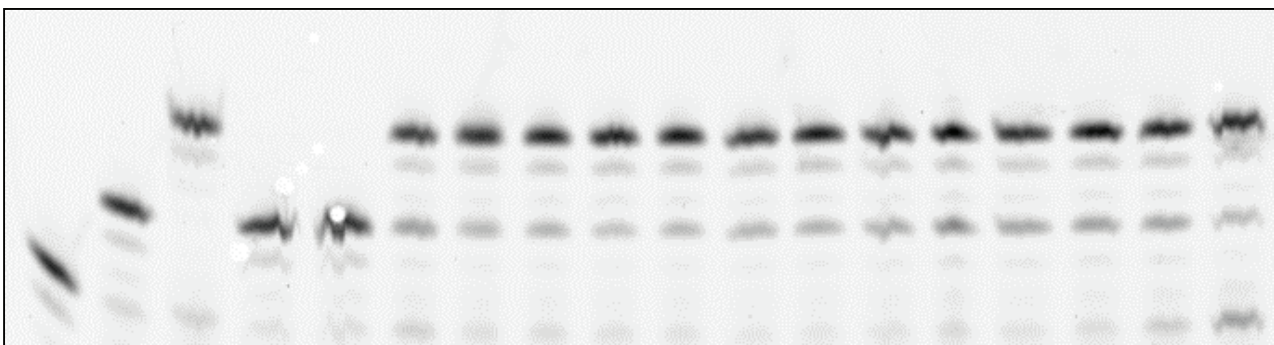

|    |    |     |              |   |     |         |    |    |    |    |    |        |    |    |    |    |    |
|----|----|-----|--------------|---|-----|---------|----|----|----|----|----|--------|----|----|----|----|----|
| %e | 0  | 100 | 0            | 0 | 69  | 78      | 79 | 84 | 82 | 77 | 78 | 73     | 69 | 72 | 74 | 73 | 82 |
|    | PU | PE  | <i>otp82</i> |   | Col | OTP82wt |    |    |    |    |    | S3[TD] |    |    |    |    |    |

**Supplemental Figure 7. Editing induced by variants of OTP82.**

Poisoned primer extension analysis of (A) *ndhG* and (B) *ndhB* of the different OTP82 genotypes. RNA was extracted from 3-week old plants and converted to cDNA. Each reaction comes from a biological replicate. PU and PE indicate an unedited and edited control, respectively. Col indicates Columbia wild-type and OTP82wt indicates *otp82* plants transformed with a construct that includes a wild-type copy of OTP82 driven by the same promoter as used to drive expression of the S3[TD] variant. % editing was calculated by measuring the intensity of the edited band.

**Supplemental Table 1.**

Primers used in this study (mutated base indicated by lower case letters)

| Primer name       | Sequence                                                                | Comment                   |
|-------------------|-------------------------------------------------------------------------|---------------------------|
| CLB19 in vivo F   | GGGGACAAGTTTGTACAAAAAGCAGGCTTCGAAGGAGATAGAACCATGATGGGTCTCCTTCCCCTCGT    |                           |
| CLB19 in vivo R   | GGGGACCACTTTGTACAAGAAAGCTGGGTCTCCACCTCCGGATCAAGCATTGAGGAGATCAC          |                           |
| CLB19 expr. F     | GGGGACAAGTTTGTACAAAAAGCAGGCTTAGAGAATCTTTATTTTCAGGGGCCAATCCAAAGATACAGAGA |                           |
| CLB19 expr. R     | GGGGACCACTTTGTACAAGAAAGCTGGGTCTCAAGCATTGAGGAGATCACC                     |                           |
| CLB19mutP1[T;D] F | GTAGAGCCTgACCACATCACTTTC                                                | T;N to T;D mutation of P1 |
| CLB19mutP1[T;D] R | GAAAGTGATGTGGTcAGGCTCTAC                                                |                           |
| CLB19mutP1[N;N] F | CTGTTTCATGGAAaTTCTCGCATC                                                | T;N to N;N mutation of P1 |
| CLB19mutP1[N;N] R | GATGCGAGAAaTCCATGAAACAG                                                 |                           |
| CLB19mutS1[N;N] F | TGTCATGGTTGGCAaCGCAATTAT                                                | T;N to N;N mutation of S1 |
| CLB19mutS1[N;N] R | CGATAATTGCGtTGCCAACCATGA                                                |                           |
| CLB19mutS1[T;D] F | GAAGATAAAgATTTCGGTTACTTGG                                               | T;N to T;D mutation of S1 |
| CLB19mutS1[T;D] R | AGTAACCGAATcTTTATCTTCCAT                                                |                           |
| CLB19mutS2[T;D] F | CGGTTACTTGGAcTACAATGATCGA                                               | N;D to T;D mutation of S2 |
| CLB19mutS2[T;D] R | TCGATCATTGTAgTCCAAGTAACCG                                               |                           |
| CLB19mutS2[S;D] F | CGGTTACTTGGAgTACAATGATCGA                                               | N;D to S;D mutation of S2 |
| CLB19mutS2[S;D] R | TCGATCATTGTATcCCAAGTAACCG                                               |                           |
| CLB19mutS2[T;N] F | CCTGAACGAaACTTGATTTCTTGG                                                | N;D to T;N mutation of S2 |
| CLB19mutS2[T;N] R | CCAAGAAATCAAGTtTCGTTTCAGG                                               |                           |
| CLB19mutP2[N;D] F | ATTTCTTGGAAaGCTATGATAAAT                                                | T;D to N;D mutation of P2 |
| CLB19mutP2[N;D] R | ATTTATCATAGCAaTCCAAGAAAT                                                |                           |
| CLB19mutP2[T;N] F | GTAAAACCAaATTACGTTGCTATT                                                | T;D to T;N mutation of P2 |
| CLB19mutP2[T;N] R | TAGCAACGTAATtTGGTTTTACTC                                                |                           |
| CLB19mutS3[T;T] F | TGAGGGTGAGTAcTTCACATGATCGATT                                            | N;T to T;T mutation of S3 |
| CLB19mutS3[T;T] R | AATCGATCAGTGAAGTACTCACCCCTCA                                            |                           |
| CLB19mutS3[T;D] F | GAGAAACGAgCGTAGTTTCGTGG                                                 | N;D to T;D mutation of S3 |
| CLB19mutS3[T;D] R | GAAACTACGtCTCGTTTCTCCAT                                                 |                           |
| CLB19mutP3[T;D] F | GTTTCGTGGAcTTCAGTCATTGTT                                                | N;D to T;D mutation of P3 |
| CLB19mutP3[T;D] R | AATGACTGAAgTCCACGAAACTAC                                                |                           |
| CLB19mutP3[T;N] F | TTTAAACCTaACGCAGTCACTTTC                                                | N;D to T;N mutation of P3 |
| CLB19mutP3[T;N] R | AGTGAAGTGGTtAGGTTTAAAGCC                                                |                           |
| CLB19mutL2[T;N] F | CGTTGCTATTAcTGCTGCTCT                                                   | I;N to T;N mutation of L2 |
| CLB19mutL2[T;N] R | AGAGCAGCAgTAATAGCAACG                                                   |                           |
| OTP82 in vivo F   | GGGGACAAGTTTGTACAAAAAGCAGGCTTCACCATGATGCTCTCGTGTCTCC                    |                           |
| OTP82 in vivo R   | GGGGACCACTTTGTACAAGAAAGCTGGGTCTTACCAGTAGTCATTGCAGGAAC                   |                           |
| OTP82mutS3[T;D] F | CTCAAGATTGTTAcTGCTCTCATTGAT                                             | N;D to T;D mutation of S3 |
| OTP82mutS3[T;D] R | ATCAATGAGAGCAgTAACAATCTTGAG                                             |                           |
